# Supplementary material
Source: PubMed Central journal article supplement (PMC4972280)
Supplement: supp_pp.16.00533_PP2016-00533R1_Figure_S2.pdf [file supp_pp.16.00533_PP2016-00533R1_Figure_S2.pdf]

## Zhao\_Supplemental Figure S2

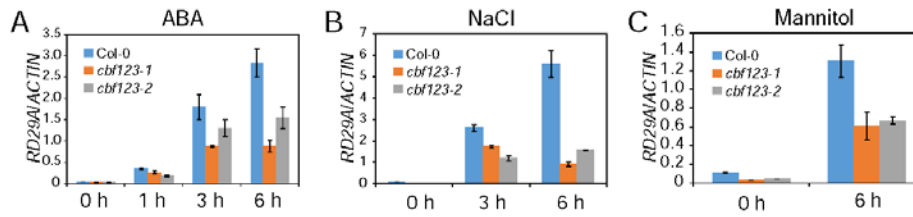

Supplemental Figure S2. Gene expression of *RD29A* after ABA, NaCl, and mannitol treatment. Eight-day-old seedlings were treated with ABA (A), NaCl (100 mM) (B), or mannitol (200 mM) (C). Expression of *RD29A* was assessed by quantitative real-time RT-PCR. *ACTIN8* was used as the internal control. Error bars indicate the standard deviation of three biological replicates.
