# Supplementary material
Source: PubMed Central journal article supplement (PMC4972280)
Supplement: supp_pp.16.00533_PP2016-00533R1_Figure_S3.pdf [file supp_pp.16.00533_PP2016-00533R1_Figure_S3.pdf]

## Zhao\_Supplemental Figure S3

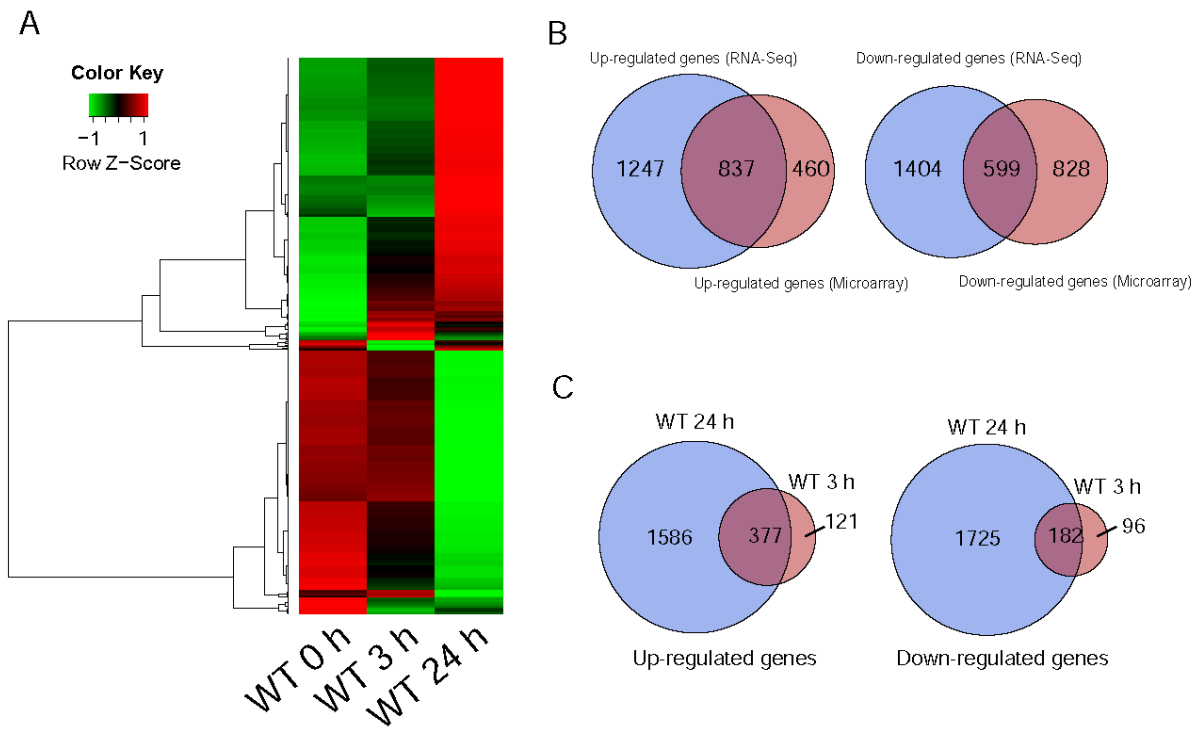

Supplemental Figure S3. Transcriptional profiling of wild-type plants after low temperature treatment. (A) Hierarchical clustering of genes that were up-regulated or down-regulated in wild-type after exposing to 4°C for 3 h and 24 h. (B) Venn diagram indicating the number and overlap of COR genes identified by RNA-seq data in this study and microarray data in a previous study. (C) Venn diagram indicating the number and the overlap of COR genes that are up-regulated (left) or down-regulated (right) at early stage (3 h) and later stage (24 h) of low temperature treatment.
