# Supplementary material
Source: PubMed Central journal article supplement (PMC4972280)
Supplement: supp_pp.16.00533_PP2016-00533R1_Figure_S4.pdf [file supp_pp.16.00533_PP2016-00533R1_Figure_S4.pdf]

# Zhao\_Supplemental Figure S4

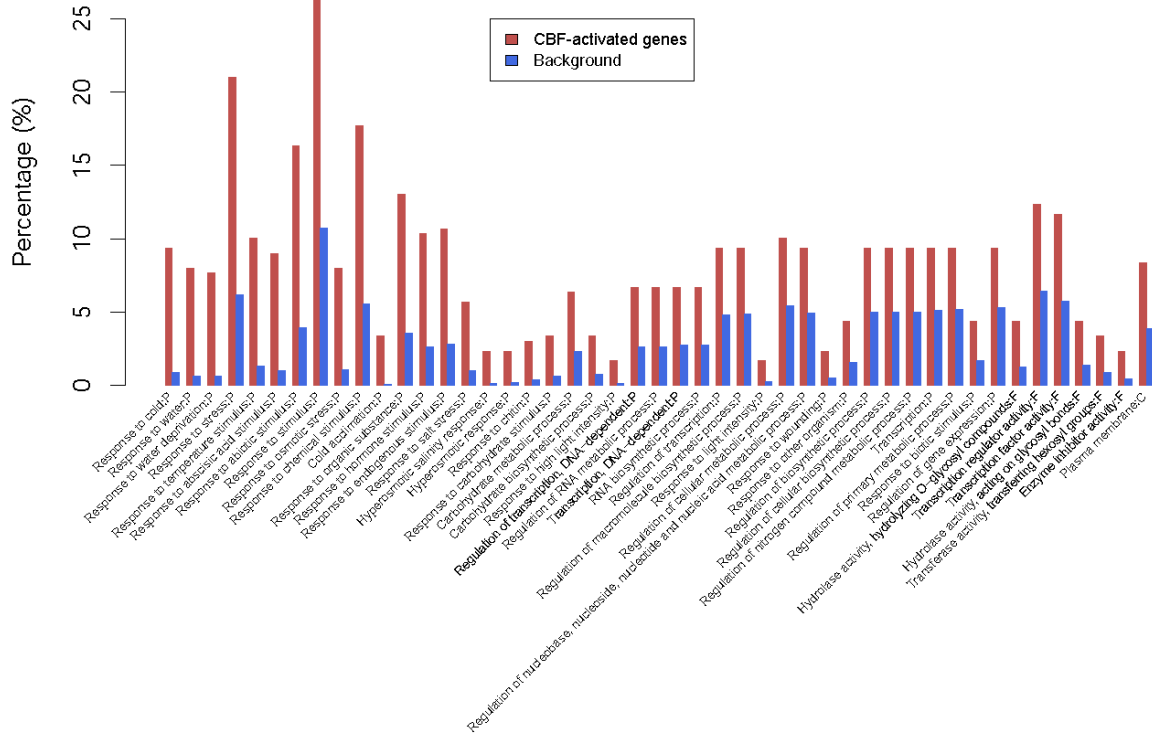

Supplemental Figure S4. GO enrichment analysis of CBF-activated genes.
