# Supplementary material
Source: PubMed Central journal article supplement (PMC4972280)
Supplement: supp_pp.16.00533_PP2016-00533R1_Figure_S5.pdf [file supp_pp.16.00533_PP2016-00533R1_Figure_S5.pdf]

## Zhao\_Supplemental Figure S5

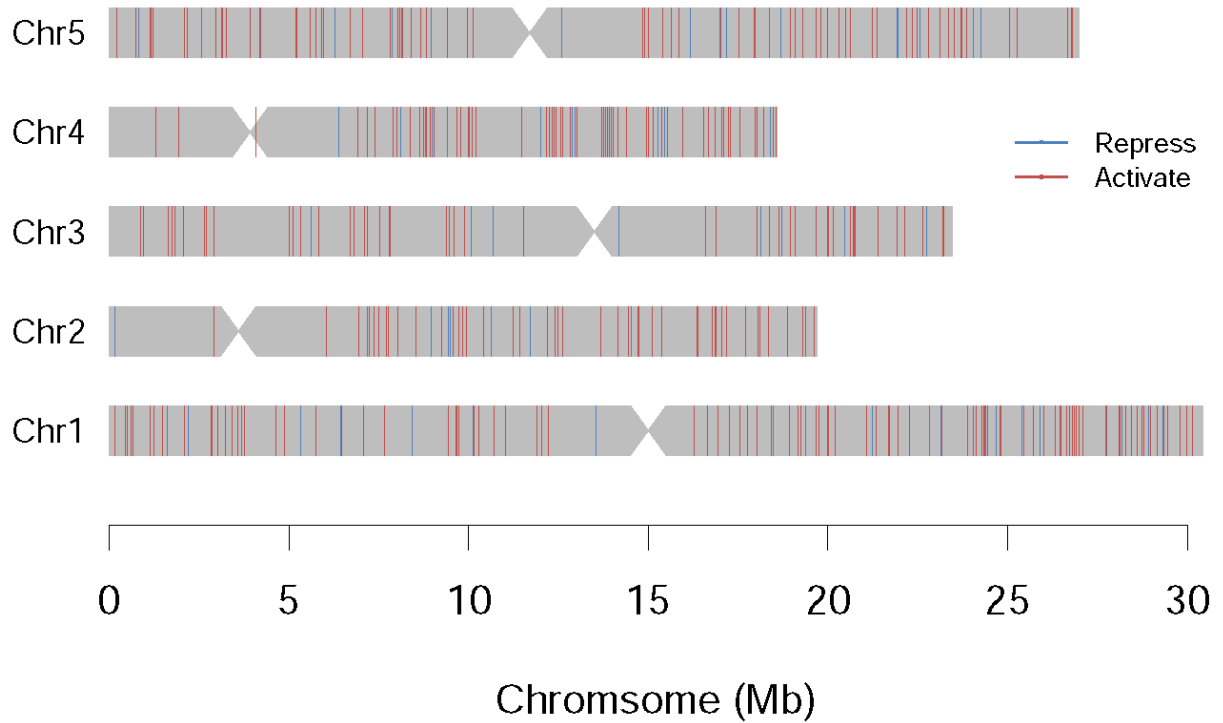

Supplemental Figure S5. The distribution of CBF-regulated genes on the chromosomes of *Arabidopsis*. The location of CBF-activated genes (red lines) and CBF-repressed genes (blue lines) on the chromosomes of *Arabidopsis* was analyzed.
