# Supplementary material
Source: PubMed Central journal article supplement (PMC4972280)
Supplement: supp_pp.16.00533_PP2016-00533R1_Figure_S6.pdf [file supp_pp.16.00533_PP2016-00533R1_Figure_S6.pdf]

## Zhao\_Supplemental Figure S6

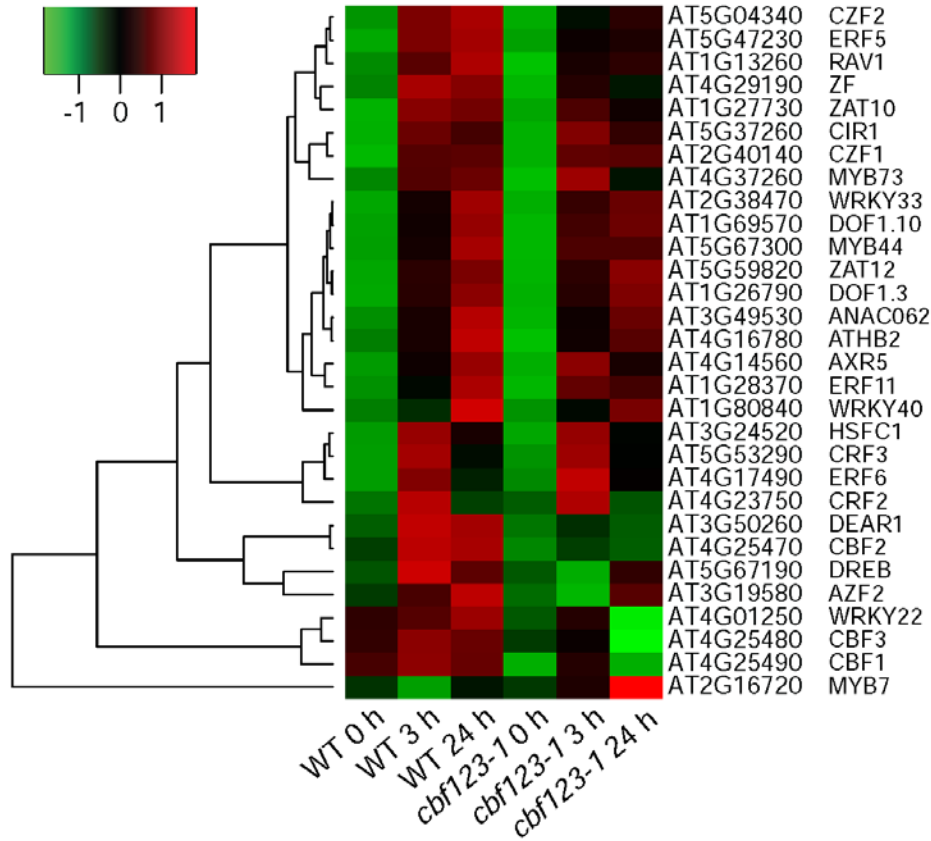

Supplemental Figure S6. Gene expression of first-wave transcription factors. The expression of 27 first-wave transcription factors was analyzed in wild-type plants and in *cbf123-1* triple mutants after low temperature treatment (4°C) for 0, 3, and 24 h.
