# Supplementary material
Source: PubMed Central journal article supplement (PMC4972280)
Supplement: supp_pp.16.00533_PP2016-00533R1_Figure_S7.pdf [file supp_pp.16.00533_PP2016-00533R1_Figure_S7.pdf]

## Zhao\_Supplemental Figure S7

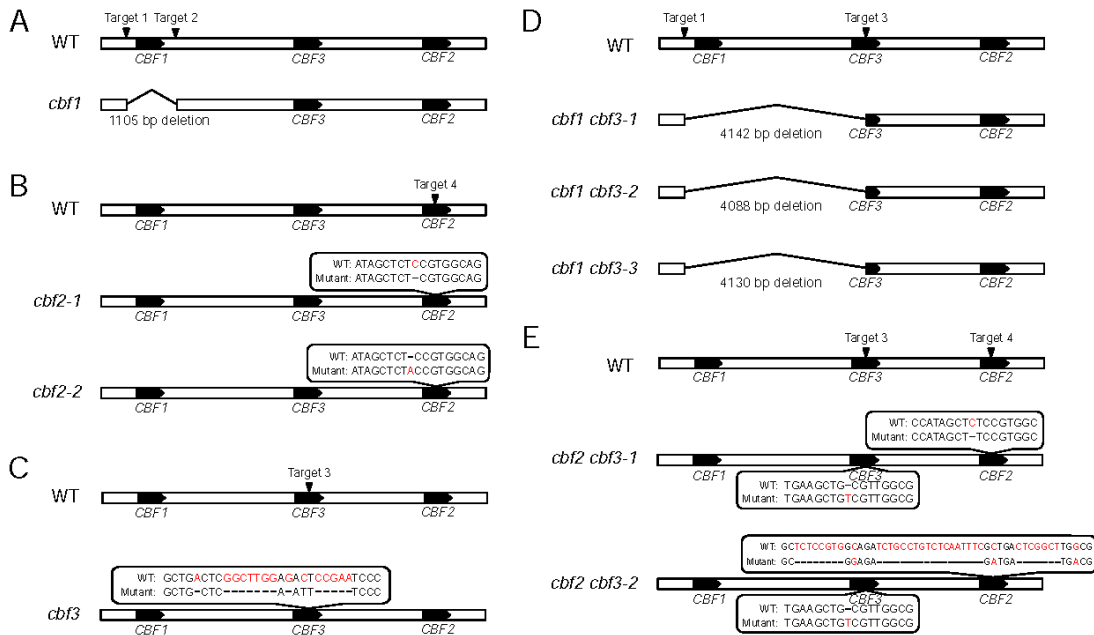

Supplemental Figure S7. Generation of the *cbf* single and double mutants using CRISPR/Cas9 technology. (A) sgRNAs targeting the promoter region and 3'UTR region of *CBF1* were used to edit *CBF1* gene. One mutant line with the complete deletion of *CBF1* was obtained. (B) sgRNA targeting the CDS region of *CBF2* were used to edit *CBF2* gene. Two mutant lines with deletion or insertion of single nucleotide in the open reading frame (ORF) region of *CBF2* were obtained. (C) sgRNA targeting the CDS region of *CBF3* were used to edit *CBF3* gene. One mutant line with the deletion of several nucleotides in the ORF region of *CBF3* was obtained. (D) sgRNAs targeting the promoter region of *CBF1* and CDS region of *CBF3* were used to edit *CBF1* and *CBF3* genes. Three independent mutant lines with the deletion of whole CDS region of *CBF1* and partial CDS region of *CBF3* were generated. (E) sgRNAs targeting the CDS regions of *CBF2* and *CBF3* were used to generate *cbf2 cbf3* double mutants. Two independent mutant lines with deletion or insertion of nucleotides in the ORF regions of both *CBF2* and *CBF3* were obtained.
