# Supplementary material
Source: PubMed Central journal article supplement (PMC4972280)
Supplement: supp_pp.16.00533_PP2016-00533R1_Figure_S8.pdf [file supp_pp.16.00533_PP2016-00533R1_Figure_S8.pdf]

## Zhao\_Supplemental Figure S8

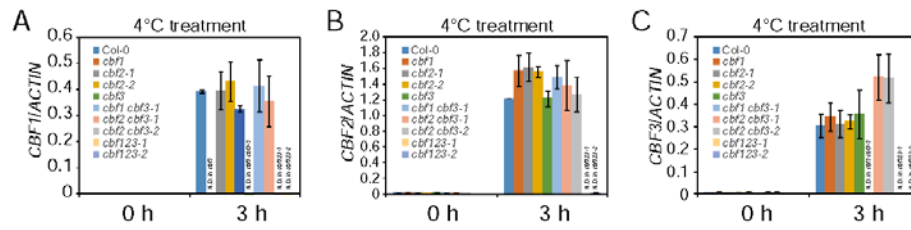

Supplemental Figure S8. Expression of *CBF* genes in the *cbf* mutants. 10-day-old seedlings were treated with low temperature (4°C) for 3 h. Transcript accumulation of *CBF1*, *CBF2*, and *CBF3* was assessed by quantitative real-time RT-PCR, and *ACTIN8* was used as the internal control. Error bars indicate the standard deviation of three biological replicates. N.D. represents that the expression of gene was not detectable.
