# Supplementary material
Source: PubMed Central journal article supplement (PMC4972280)
Supplement: supp_pp.16.00533_PP2016-00533R1_Figure_S9.pdf [file supp_pp.16.00533_PP2016-00533R1_Figure_S9.pdf]

## Zhao\_Supplemental Figure S9

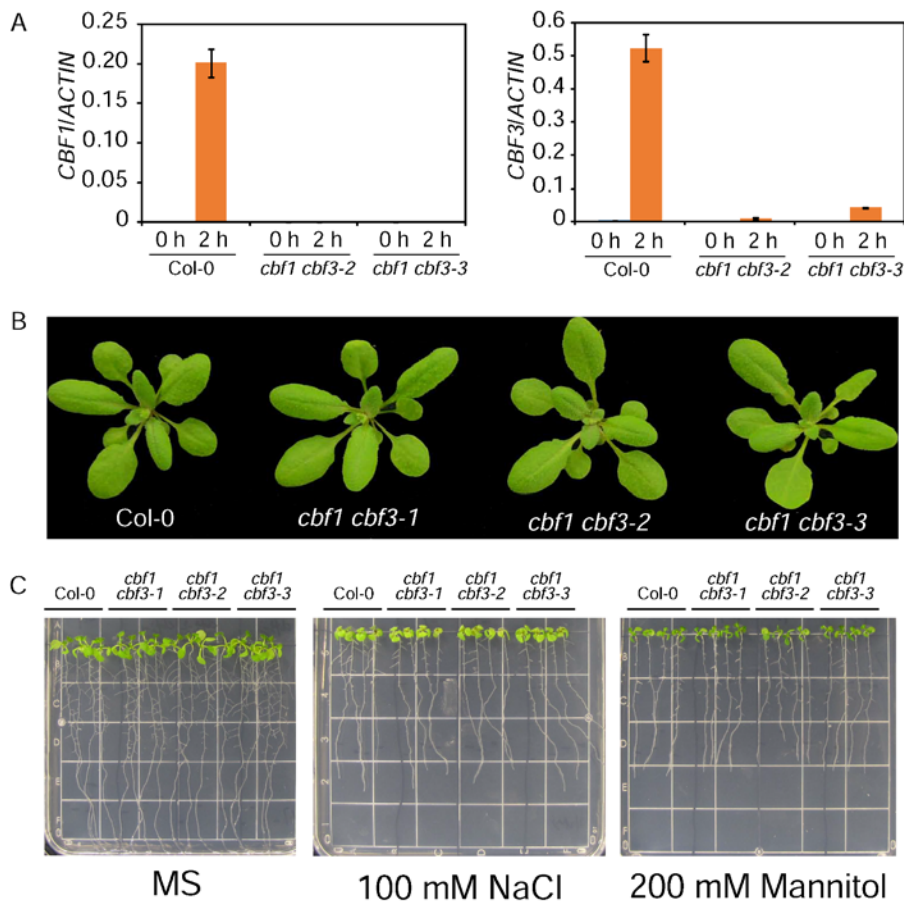

Supplemental Figure S9. Phenotype of the *cbf1 cbf3* double mutants. (A) Accumulation of *CBF1* and *CBF3* transcripts in plants that were treated with low temperature (4°C) for 2 h. Transcript accumulation was assessed by quantitative real-time RT-PCR, and *ACTIN8* was used as the internal control. Error bars indicate the standard deviation of three biological replicates. (B) The phenotype of Col-0 and three *cbf1 cbf3* double mutant lines grown in a greenhouse at 23°C and with a 15-h light/9-h dark regime. Plants were photographed after 4 weeks. (C) Growth of Col-0, *cbf1 cbf3-1*, *cbf1 cbf3-2* and *cbf1 cbf3-3* plants on MS, NaCl (100 mM), and mannitol (200 mM) media. The seedlings were first grown on MS medium for 3 days and then transferred to the three media. Seedlings were photographed after 10 days of growth on the three media.
