# Supplementary material
Source: PubMed Central journal article supplement (PMC4972280)
Supplement: supp_pp.16.00533_PP2016-00533R1_Figure_S10.pdf [file supp_pp.16.00533_PP2016-00533R1_Figure_S10.pdf]

## Zhao\_Supplemental Figure S10

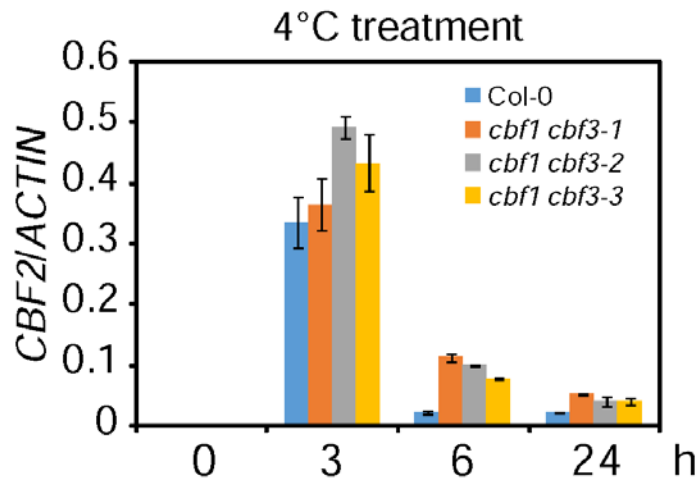

Supplemental Figure S10. The expression of *CBF2* gene in wild type and *cbf1 cbf3* double mutants. 10-day-old seedlings were treated with low temperature (4°C) for 0, 3, 6, and 24 h. Transcript accumulation of *CBF2* was assessed by quantitative real-time RT-PCR, and *ACTIN8* was used as the internal control. Error bars indicate the standard deviation of three biological replicates.
