# Supplementary material
Source: PubMed Central journal article supplement (PMC4972280)
Supplement: supp_pp.16.00533_PP2016-00533R1_Figure_S11.pdf [file supp_pp.16.00533_PP2016-00533R1_Figure_S11.pdf]

## Zhao\_Supplemental Figure S11

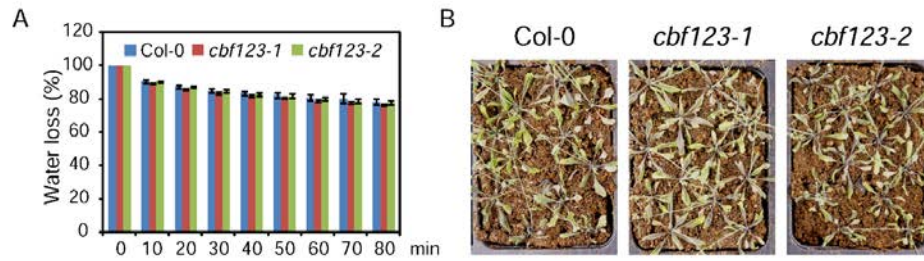

Supplemental Figure S11. *CBF* genes are not required for drought tolerance in *Arabidopsis*. (A) Water loss of 4-week-old Col-0, *cbf123-1*, and *cbf123-2* plants. Whole plants were removed from soil and weighed at indicated times (n=3). Error bars indicate the standard deviation of three biological replicates. (B) Drought tolerance of Col-0, *cbf123-1*, and *cbf123-2* plants. Plants were grown under standard condition for 3 weeks, and then drought tolerance assay was conducted by withholding water for 2 weeks, after which plants were photographed.
