# Supplementary material
Source: PubMed Central journal article supplement (PMC4972280)
Supplement: supp_pp.16.00533_PP2016-00533R1_Figure_S12.pdf [file supp_pp.16.00533_PP2016-00533R1_Figure_S12.pdf]

Zhao\_Supplemental Figure S12

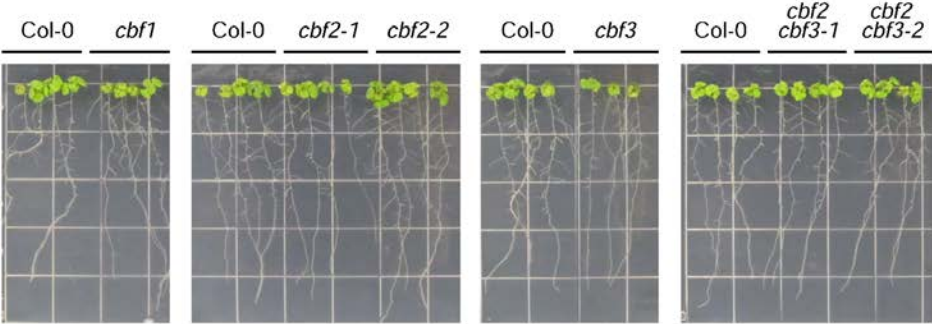

Supplemental Figure S12. Phenotype of the *cbf* single and double mutants under salt stress. The seedlings were first grown on MS medium for 3 days and then transferred to salt media. Seedlings were photographed after 10 days of growth on salt media.
