# Supplementary material
Source: PubMed Central journal article supplement (PMC4972280)
Supplement: supp_pp.16.00533_PP2016-00533R1_Figure_S13.pdf [file supp_pp.16.00533_PP2016-00533R1_Figure_S13.pdf]

## Zhao\_Supplemental Figure S13

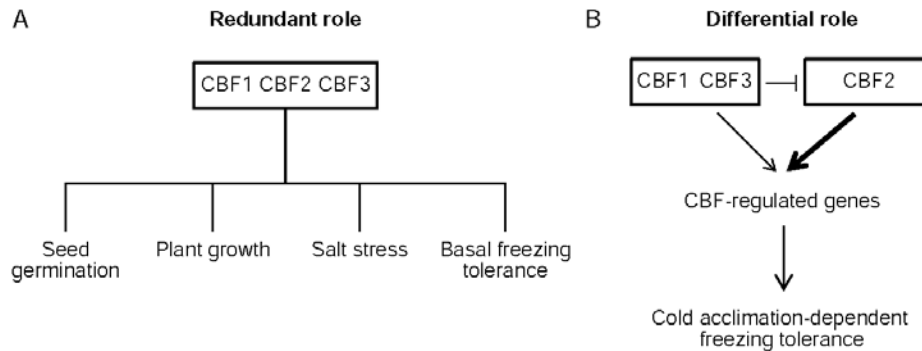

Supplemental Figure S13. A summary diagram showing the functions of three *CBF* genes. (A) The three *CBF* genes are redundant in the regulation of seed germination, plant growth, salt stress response and basal freezing tolerance. (B) The expression of *CBF2* gene is negatively affected by *CBF1* and *CBF3*. *CBF2* probably plays a more important role than *CBF1* and *CBF3* in the regulation of downstream *COR* genes and cold acclimation-dependent freezing tolerance.
